# Supplementary material for: Growth of vertically aligned MoS2 nanosheets on a Ti substrate through a self-supported bonding interface for high-performance lithium-ion batteries: a general approach
Source: Royal Society of Chemistry journal article supplement (doi:10.1039/c6ta01116k), 2016-01-01
Supplement: c6ta01116k1.pdf [file c6ta01116k1.pdf]

## Supporting Information

### **Growth of vertically aligned MoS<sub>2</sub> nanosheets on Ti substrate through self-supported bonding interface for high-performance lithium-ion batteries: a general approach**

Yu Zhou,<sup>a</sup> Yong Liu,<sup>\*a</sup> Wenxia Zhao,<sup>b</sup> Fangyan Xie,<sup>b</sup> Ruimei Xu,<sup>b</sup> Baojun Li,<sup>a</sup> Xiang Zhou,<sup>a</sup> and Hui Shen<sup>c</sup>

<sup>a</sup>School of Materials Science and Engineering, State Key Laboratory of Optoelectronic Materials and Technologies, Sun Yat-sen University, Guangzhou 510275, China.

\*E-mail: [liuyong7@mail.sysu.edu.cn](mailto:liuyong7@mail.sysu.edu.cn).

<sup>b</sup>Instrumental Analysis & Research Center, Sun Yat-sen University, Guangzhou 510275, China.

<sup>c</sup>Institute for solar energy system, School of Physics, Sun Yat-sen University, Guangzhou 510275, China.

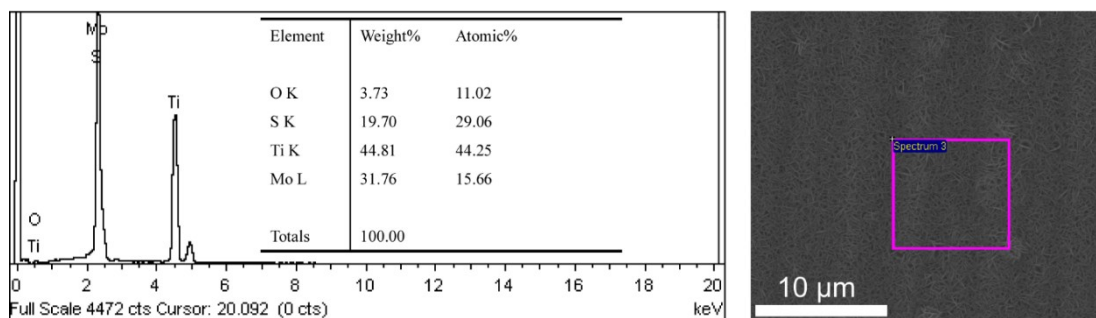

**Fig. S1** EDS spectrum of MoS<sub>2</sub> nanosheets grown on the Ti substrate that measured from the pink square circle in right SEM image, inset is a summarized Table of element composition.

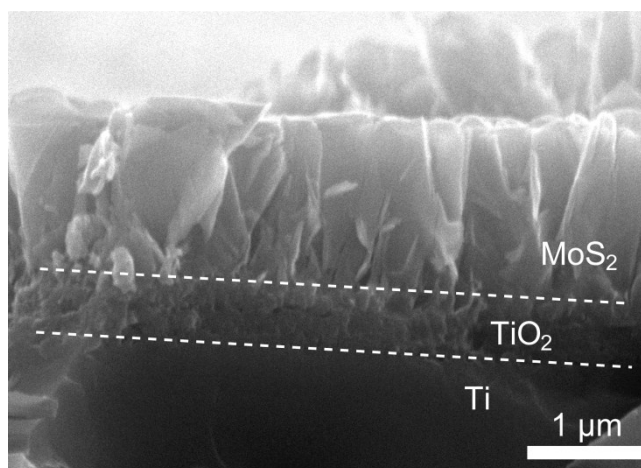

**Fig. S2** Cross-sectional SEM images of the fresh MoS<sub>2</sub>-230-nanosheet electrode grown on Ti substrate *via* the TiO<sub>2</sub> intermediate layer.

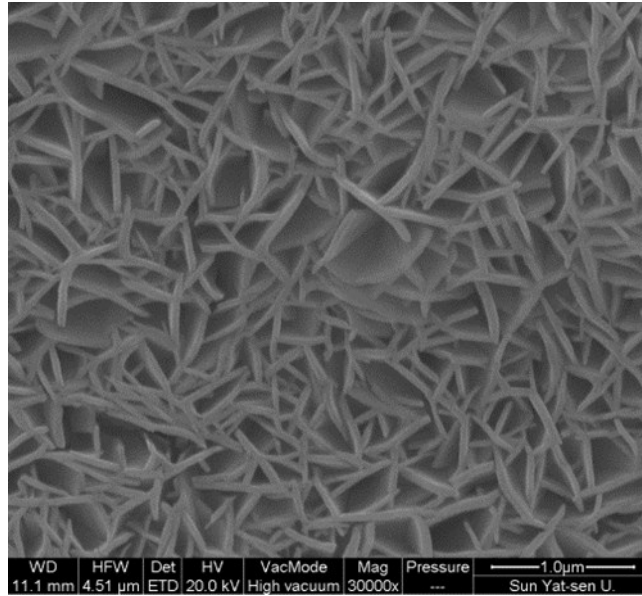

**Fig. S3** FESEM image of the MoS<sub>2</sub>-230-nanosheet sample after sintering at 800 °C for 2 h.

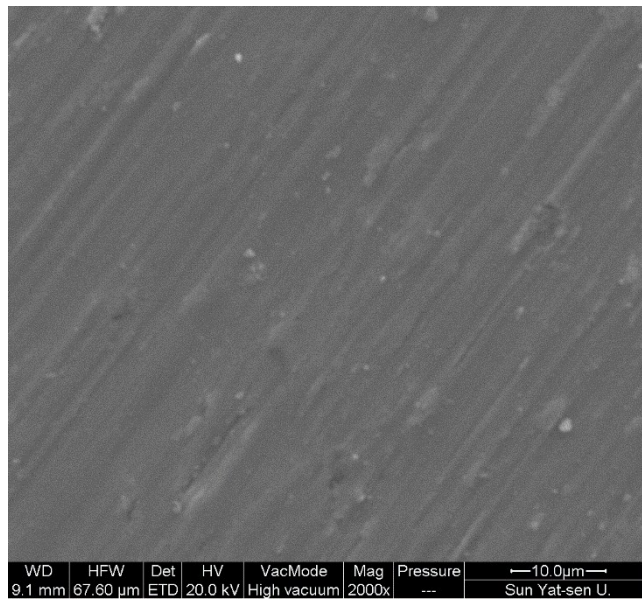

**Fig. S4** SEM images of Ti foil with relatively rough surface after being treated with sandpaper dermabrasion.

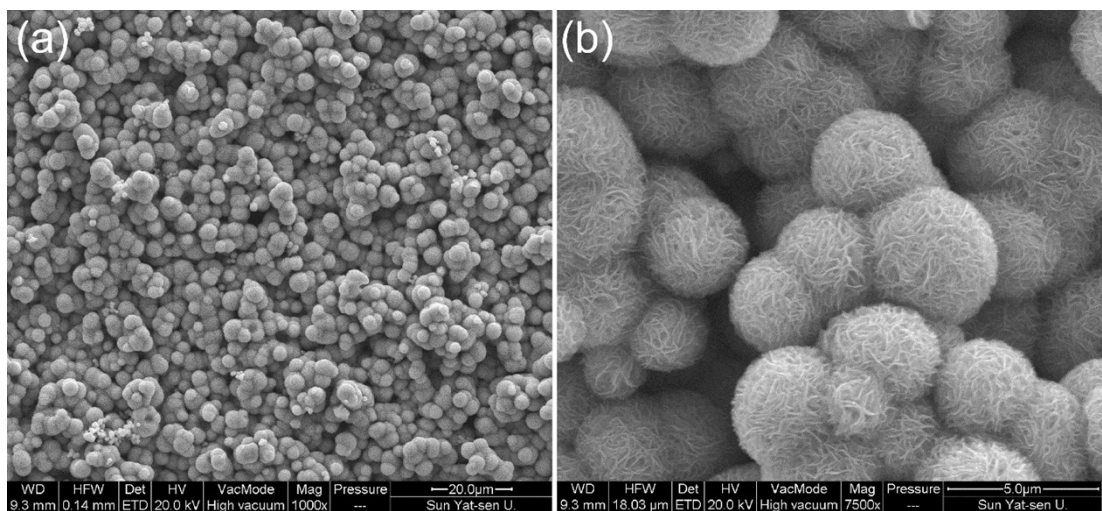

**Fig. S5** (a) low magnification and (b) high magnification SEM images of MoS<sub>2</sub> nanosheets assembled hierarchical spheres produced without the addition of ammonia solution, which were collected from the precipitate in the vessel bottom instead of Ti foil.

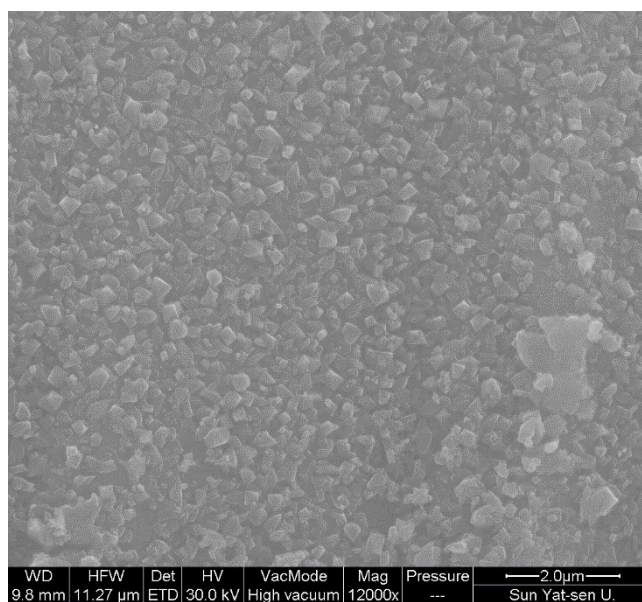

**Fig. S6** SEM image of rutile TiO<sub>2</sub> nanocrystals formed on Ti foil, which was obtained in 60 mL ammonia solution at hydrothermal temperature of 230 °C for 24 h without addition of any Mo and S precursors.

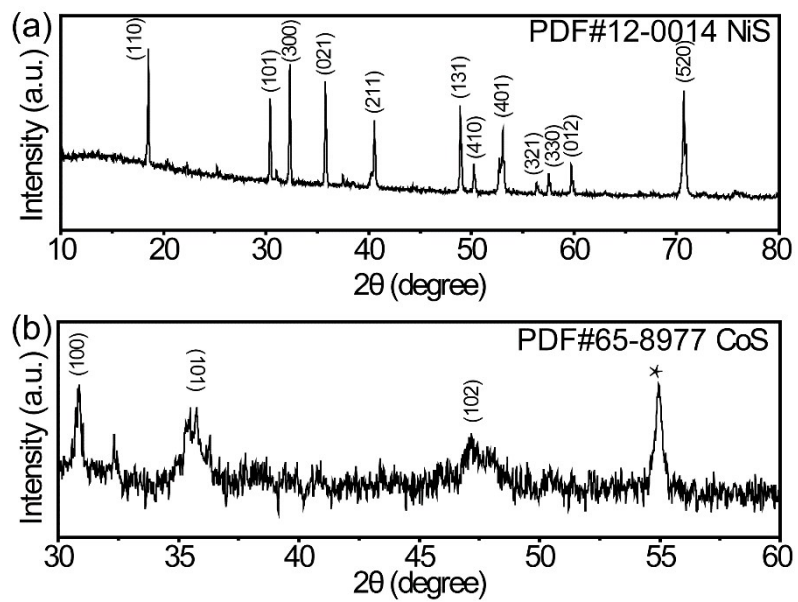

**Fig. S7** XRD measurements of other active materials with nanosheet structure grown on Ti substrate. (a) NiS nanosheets, and (b) CoS nanosheets. Some peaks marked with asterisk (\*) represent  $\text{TiO}_2$  phase.

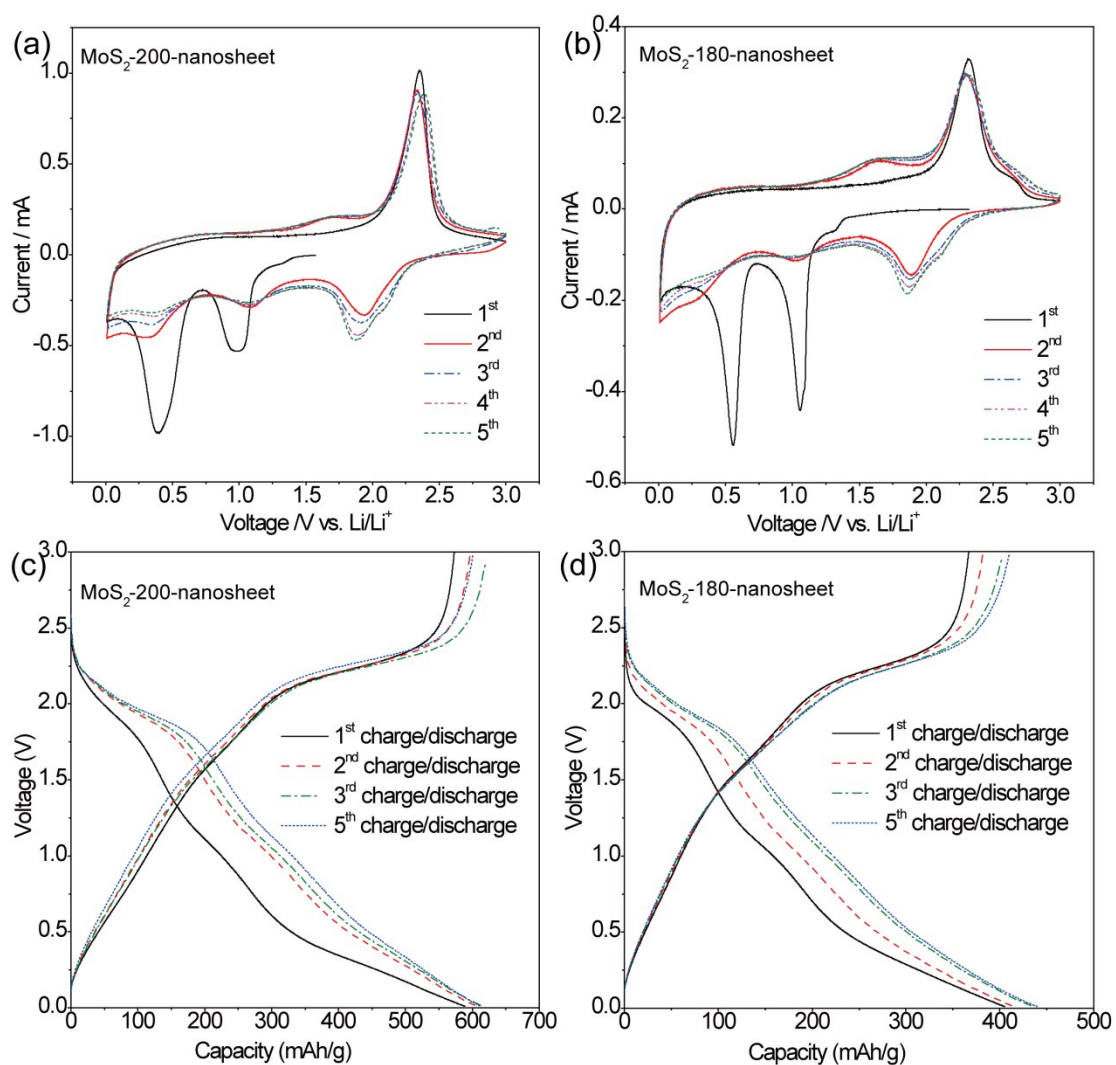

**Fig. S8** The represented cyclic voltammetry curves of (a) MoS<sub>2</sub>-200-nanosheet electrode and (b) MoS<sub>2</sub>-180-nanosheet electrode scanned at 0.5 mV S<sup>-1</sup> in a voltage window of 0.01-3.0 V. The charge-discharge voltage profiles of (c) MoS<sub>2</sub>-200-nanosheet electrode and (d) MoS<sub>2</sub>-180-nanosheet electrode cycled between 0.01 and 3 V (vs Li/Li<sup>+</sup>) at a current density of 100 mA g<sup>-1</sup>.

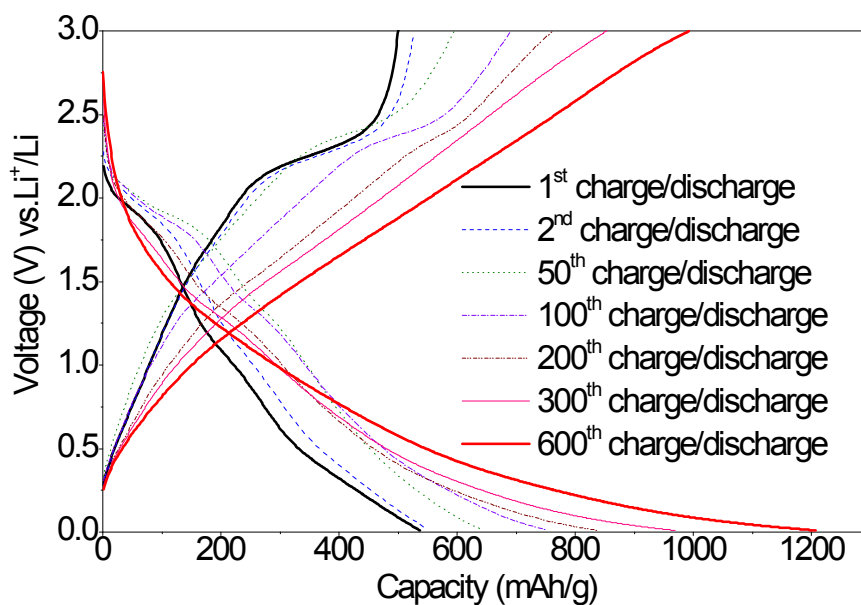

**Fig. S9** Voltage profiles of MoS<sub>2</sub>-230-nanosheet electrode for the 1<sup>st</sup>, 2<sup>nd</sup>, 50<sup>th</sup>, 100<sup>th</sup>, 200<sup>th</sup>, 300<sup>th</sup>, and 600<sup>th</sup> cycled between 0.01 and 3 V (vs. Li/Li<sup>+</sup>) at a current density of 1000 mA g<sup>-1</sup>.

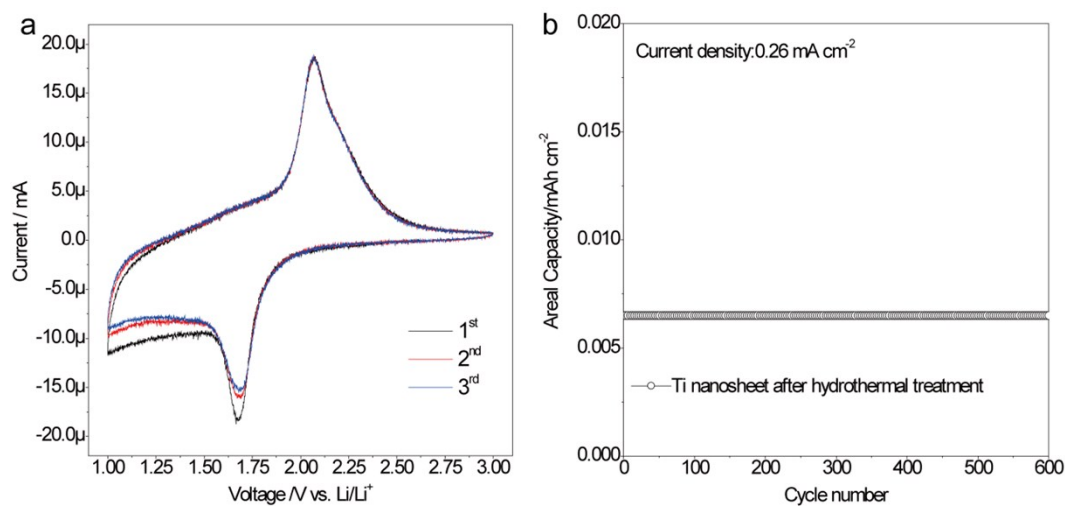

**Fig. S10** (a) CV curves and (b) cycling performance of Ti substrate grown with thin TiO<sub>2</sub> layer after hydrothermal treatment without addition of Mo and S sources.

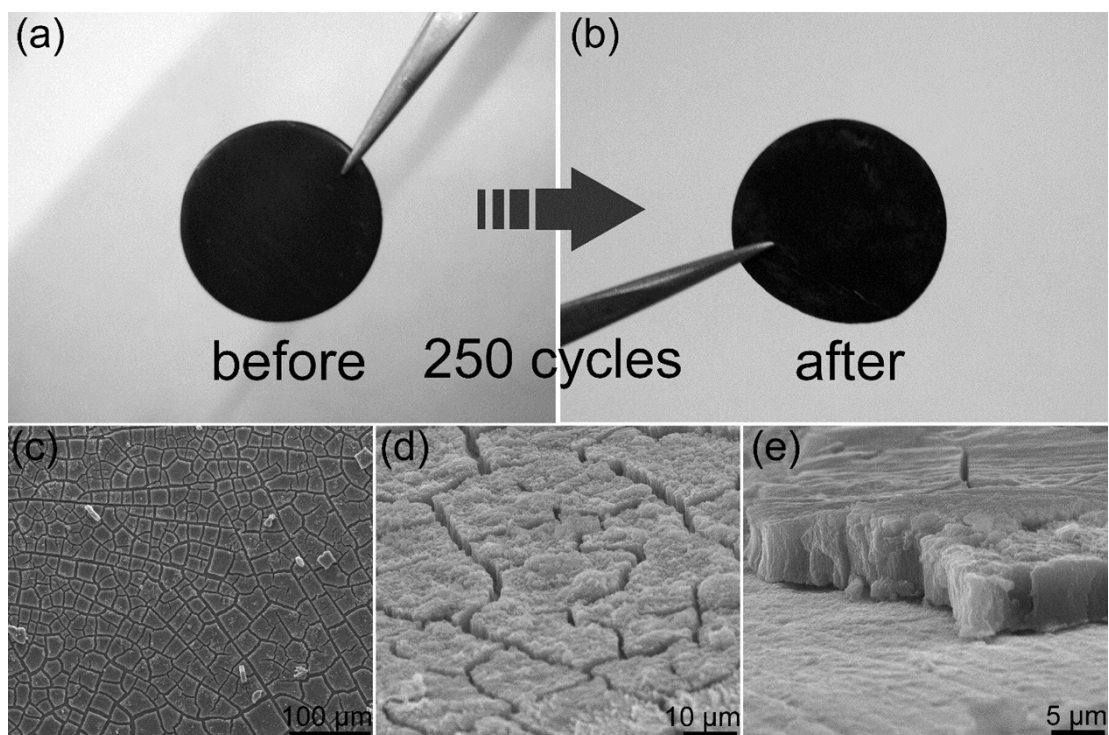

**Fig. S11** (a) and (b): Pictures of the MoS<sub>2</sub>-230-nanosheet electrode slice before and after 250 discharging/charge process; (c) and (d): Top view and (e) side view SEM images of cycled electrode.

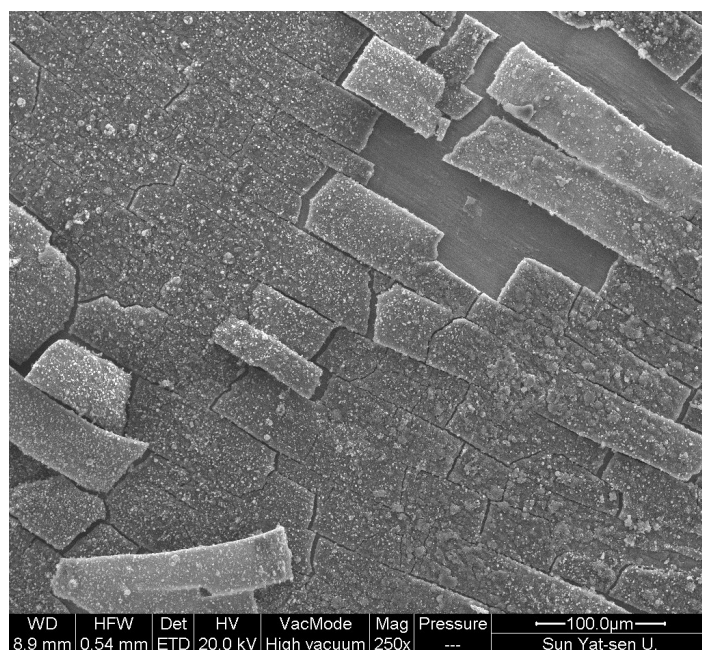

**Fig. S12** SEM image of the cycled MoS<sub>2</sub>-180-nanosheet electrode after 250 discharging/charge process.



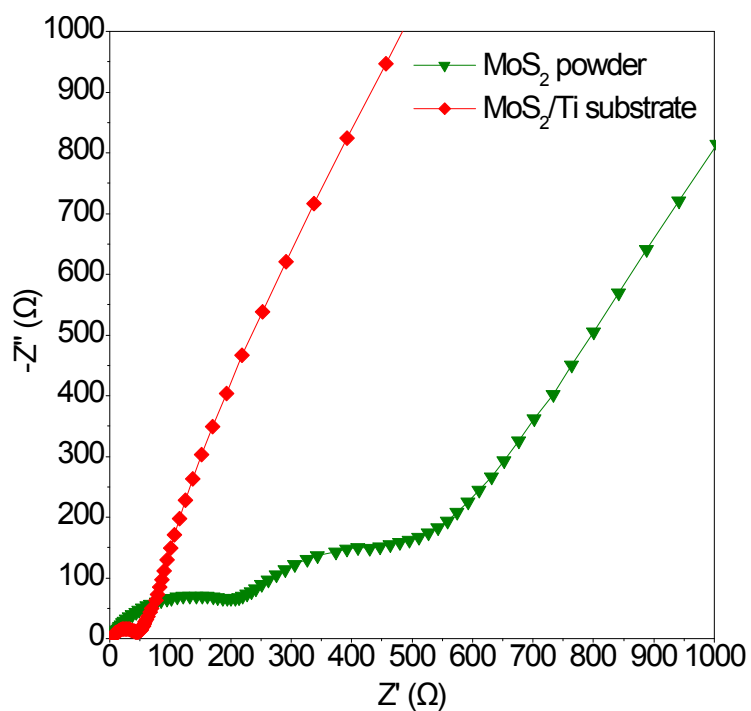

**Fig. S13** Nyquist plots of  $\text{MoS}_2$ -230-nanosheet electrodes with  $\text{TiO}_2$  bonding interface layer and scraped  $\text{MoS}_2$ -230-nanosheet electrode without  $\text{TiO}_2$  bonding interface layer obtained after 50 discharge/charge cycles at a current rate of  $500 \text{ mA g}^{-1}$ .

**Tab. S1** Kinetic parameters of LIBs constructed by  $\text{MoS}_2$ -230-nanosheet,  $\text{MoS}_2$ -200-nanosheet,  $\text{MoS}_2$ -180-nanosheet and scraped  $\text{MoS}_2$ -230-nanosheet electrode after galvanostatic discharging/charging cycles.

| Sample                                | $R_e (\Omega)$ | $R_f (\Omega)$ | $R_{ct} (\Omega)$ |
|---------------------------------------|----------------|----------------|-------------------|
| $\text{MoS}_2$ -230-nanosheet         | 1.5            | 18.6           | 37.1              |
| $\text{MoS}_2$ -200-nanosheet         | 1.8            | 20.6           | 44.6              |
| $\text{MoS}_2$ -180-nanosheet         | 2.0            | 55.7           | 77.6              |
| Scraped $\text{MoS}_2$ -230-nanosheet | 5.0            | 204.8          | 355.3             |
